# Supplementary material
Source: PubMed Central journal article supplement (PMC7328854)
Supplement: NIHMS1596358-supplement-Materials_List.pdf [file NIHMS1596358-supplement-Materials_List.pdf]

Materials List for:

# Visualizing Protein Kinase A Activity In Head-fixed Behaving Mice Using In Vivo Two-photon Fluorescence Lifetime Imaging Microscopy

Bart C. Jongbloets<sup>\*1</sup>, Lei Ma<sup>\*1</sup>, Tianyi Mao<sup>1</sup>, Haining Zhong<sup>1</sup>

<sup>1</sup>Vollum Institute, Oregon Health & Science University

\*These authors contributed equally

Correspondence to: Bart C. Jongbloets at [jongbloet@ohsu.edu](mailto:jongbloet@ohsu.edu), Haining Zhong at [zhong@ohsu.edu](mailto:zhong@ohsu.edu)

URL: <https://www.jove.com/video/59526>

DOI: [doi:10.3791/59526](https://doi.org/10.3791/59526)

## Materials

| Name                                                    | Company                  | Catalog Number | Comments                                                                                         |
|---------------------------------------------------------|--------------------------|----------------|--------------------------------------------------------------------------------------------------|
| 0.2 µm cellulose acetate syringe filter                 | Nalgene                  | 190-2520       | Step 3.2.2.                                                                                      |
| 16x 0.8 NA water-immersion objective                    | Nikon                    | MRP07220       | Step 5.5.                                                                                        |
| 3-pin cable                                             | US digital               | CA-MIC3-SH-NC  | Step 2.5. To connect rotation sensor to the DAQ input of the microscope                          |
| Aluminum bread board                                    | Thorlabs                 | MB1012         | Step 2.5.                                                                                        |
| AnimalTracker MATLAB software                           | N/A                      | N/A            | Step 2.5 and sections 5 - 6. Will be provided upon request to the lead author                    |
| Band-pass barrier filter                                | Chroma                   | ET500-40m      | Step 1.4.                                                                                        |
| Cage plate                                              | Thorlabs                 | CP01           | Step 2.4. Used as mount for rotation sensor                                                      |
| Carbon steel burrs for micro drill, 0.5 mm tip diameter | FST                      | 19007-05       | Steps 3.2.3. and 4.4.                                                                            |
| Circular coverslip (5 mm diameter)                      | VWR                      | 101413-528     | Step 4.5.                                                                                        |
| Custom-made injection needle holder                     | N/A                      | N/A            | Step 3.2.4. Technical details provided upon request to the lead author                           |
| Dental acrylic                                          | Yates Motloid            | 44114          | Steps 4.3. and 4.5.                                                                              |
| Dental drill; Microtorque ii                            | Ram products             | 66699          | Steps 3.2.3. and 4.4.                                                                            |
| Dowsil transparent polymer                              | The Dow Chemical Company | 3-4680         | Step 4.5. Artificial dura                                                                        |
| Electroporation electrode                               | Bex                      | LF650P5        | Step 3.1.4.                                                                                      |
| Electroporator                                          | Bex                      | CUY21          | Step 3.1.4.                                                                                      |
| Fast green FCF                                          | Sigma-aldrich            | F7258-25G      | Step 3.1.1.                                                                                      |
| FLIMimage MATLAB software                               | N/A                      | N/A            | Section 5. Kindly provided by Dr. Ryohei Yasuda, Max Planck Florida                              |
| FLIMview MATLAB software                                | N/A                      | N/A            | Sections 5. and 6. Will be provided upon request to the lead author                              |
| Foam-compatible glue (Gorilla White Glue)               | Gorilla                  | 5201204        | Step 2.3.                                                                                        |
| Headplate                                               | N/A                      | N/A            | Step 4.3. Technical details provided upon request to the lead author                             |
| Headplate holder                                        | N/A                      | N/A            | Step 2.6. Technical details provided upon request lead author, used in combination with mounting |

|                                                       |                               |                           |                                                                                                                                                     |
|-------------------------------------------------------|-------------------------------|---------------------------|-----------------------------------------------------------------------------------------------------------------------------------------------------|
|                                                       |                               |                           | post bracket and right-angled bracket                                                                                                               |
| Hydraulic micromanipulator                            | Narishige                     | MO-10                     | Step 3.2.4.                                                                                                                                         |
| Krazy glue                                            | Krazy glue                    | KG82648R                  | Step 4.3. Cyanoacrylate-based glue                                                                                                                  |
| Low-noise fast photomultiplier tube                   | Hamamatsu                     | H7422PA-40 or H10769PA-40 | Step 1.3.                                                                                                                                           |
| MATLAB 2012b                                          | Mathworks                     | N/A                       | Steps 2.6, and sections 5, and 6. Used to run microscope acquisition and data analysis software                                                     |
| Motor                                                 | Zhengke                       | ZGA37RG                   | Step 2.4.                                                                                                                                           |
| Motor speed controller                                | Elenker                       | EK-G00015A1-1             | Step 2.5.                                                                                                                                           |
| Motorized micromanipulator                            | Sutter                        | MP-285                    | Step 3.2.4.                                                                                                                                         |
| Mounting base                                         | Thorlabs                      | BA1S                      | Step 2.5. Used for posts for motor and sensor in combination with PH4 and TR2                                                                       |
| Mounting post                                         | Thorlabs                      | P14                       | Step 2.6. Used for headplate holder post in combination with PB2                                                                                    |
| Mounting post base                                    | Thorlabs                      | PB2                       | Step 2.6. Used for headplate holder post in combination with P14                                                                                    |
| Mounting post bracket                                 | Thorlabs                      | C1515                     | Step 2.6. Used in combination with right-angle bracket and headplate holder                                                                         |
| Optical post                                          | Thorlabs                      | TR2                       | Step 2.5. Used for posts for motor and sensor in combination with BA1S and PH4                                                                      |
| Phosphate-buffered saline                             | N/A                           | N/A                       | Step 3.2.2. Protocol: Cold Spring Harbor Protocols 2006, doi: 10.1101/pbd.rec8247                                                                   |
| Photodiode                                            | Thorlabs                      | FDS010                    | Step 1.2.                                                                                                                                           |
| Photon timing counting module                         | Becker and Hickl              | SPC-150                   | Step 1.1.                                                                                                                                           |
| Plasmid: tAKARα (CAG-tAKARα-WPRE)                     | Addgene                       | 119913                    | Step 3.1.3.                                                                                                                                         |
| Post holder                                           | Thorlabs                      | PH4                       | Step 2.5. Used for posts for motor and sensor in combination with BA1S and TR2                                                                      |
| Right-angle bracket                                   | Thorlabs                      | AB90                      | Step 2.6 Used in combination with mounting post bracket and headplate holder                                                                        |
| Rotation encoder                                      | US digital                    | MA3-A10-250-N             | Step 2.4.                                                                                                                                           |
| Rubber mat                                            | Rubber-Cal                    | B01DCR5LUG                | Step 2.1.                                                                                                                                           |
| Shaft coupling (1/4 inch x 1/4 inch)                  | McMaster                      | 6208K433                  | Steps 2.3. and 2.4.                                                                                                                                 |
| ScanImage 3.6                                         | Svoboda Lab/Vidrio Technology | N/A                       | Steps 5.9. and 6.1.                                                                                                                                 |
| Signal splitter                                       | Becker and Hickl              | HPM-CON-02                | Step 1.3.1.                                                                                                                                         |
| Stainless steel axle (diameter 1/4 inch, L = 12 inch) | McMaster                      | 1327K66                   | Step 2.3.                                                                                                                                           |
| Stereotaxic alignment systsem                         | David kopf                    | 1900                      | Steps 3.2. and 4.1. modified; Sutter micromanipulator, custom-made injection needle holder, hydraulic micromanipulator                              |
| Two-photon microscope                                 | N/A                           | N/A                       | Section 5. Built based on Modular in vivo multiphoton microscopy system (MIMMS) from HHMI Janelia Research Campus ( <a href="https://">https://</a> |

|                                                          |                              |                                |                                                                                            |
|----------------------------------------------------------|------------------------------|--------------------------------|--------------------------------------------------------------------------------------------|
|                                                          |                              |                                | <a href="http://www.janelia.org/open-science/mimms">www.janelia.org/open-science/mimms</a> |
| Vetbond tissue adhesive                                  | 3M                           | 14006                          | Step 3.2.6.                                                                                |
| Virus: tAKAR $\alpha$ (AAV2/1 hSyn-tAKAR $\alpha$ -WPRE) | Addgene                      | 119921                         | Step 3.2.2.                                                                                |
| White PE foam roller (8 inch x 12 inch)                  | Fabrication enterprises INC. | 30-2261                        | Step 2.1.1.                                                                                |
| White polystyrene fom ball halves                        | GrahamSweet                  | 200mm diameter 2 hollow halves | Step 2.1.1.                                                                                |
| Zipkicker                                                | PACER                        | PT29                           | Step 4.3. Hardening accelerator                                                            |
